# Supplementary material for: Uncertainty quantification of flood mitigation predictions and implications for decision making
Source: Copernicus journal article supplement (doi:10.5194/nhess-2018-325), 2018-11-14

**Dike Relocation**  
DIKERELOC

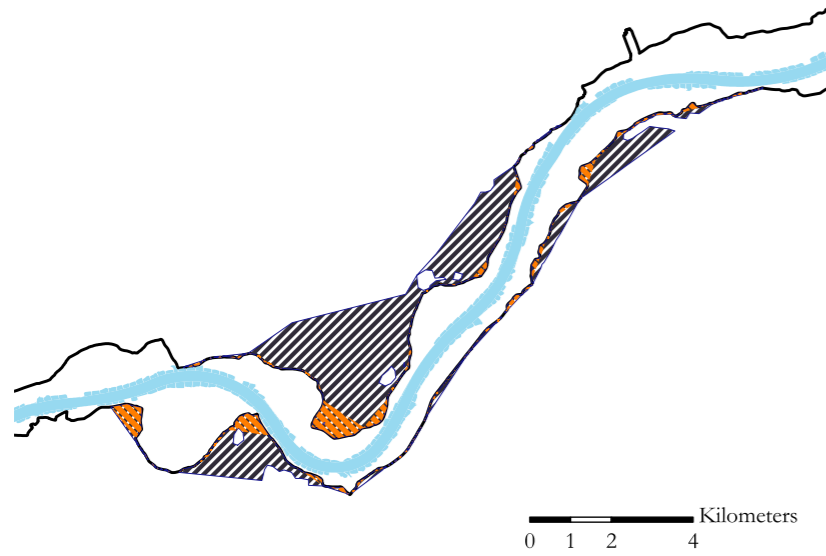

**Side channels**  
SIDECHAN

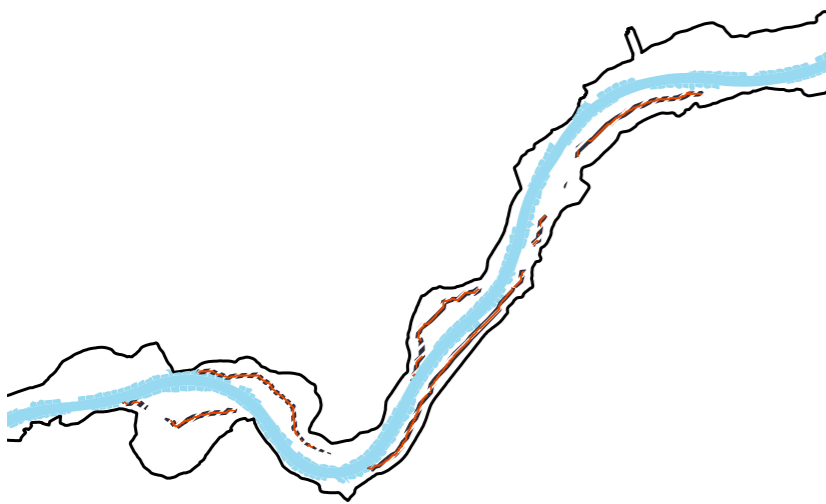

**Groyne lowering**  
GROYNLOW

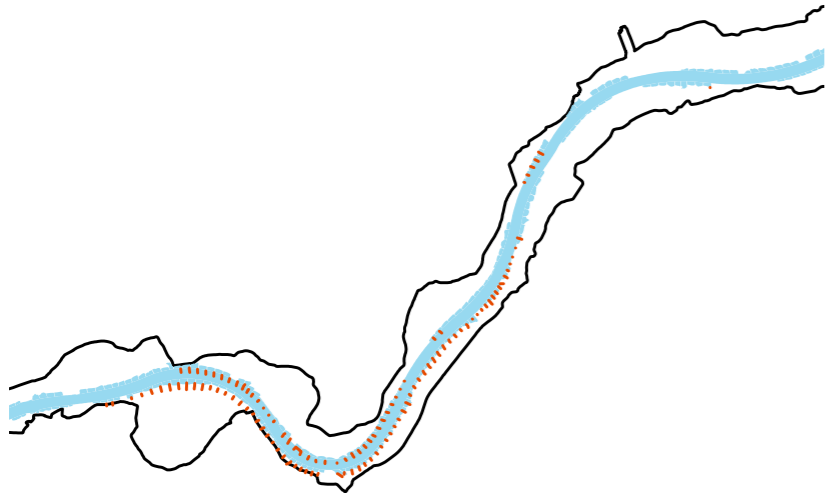

**Legend**

Reference

- Extend of floodplain
- Main channel

Altered by intervention:

- High-intensity intervention
- Low-intensity intervention
- Lowered groyne/minor embankment

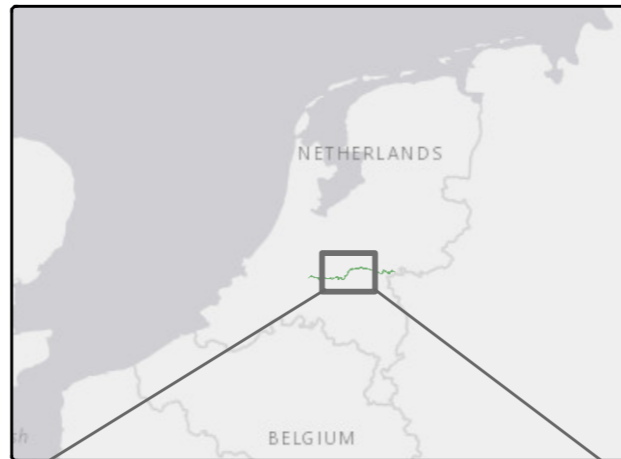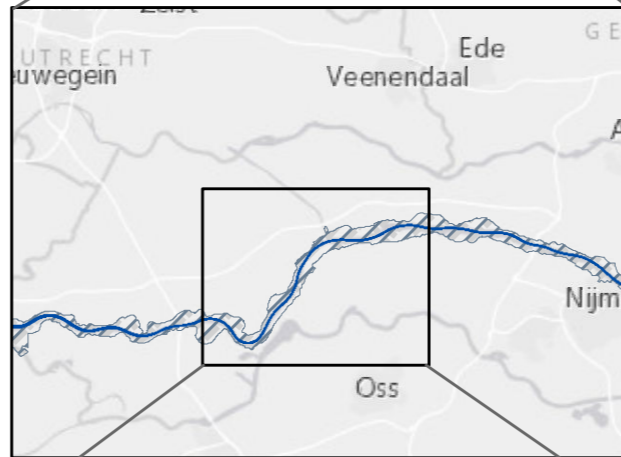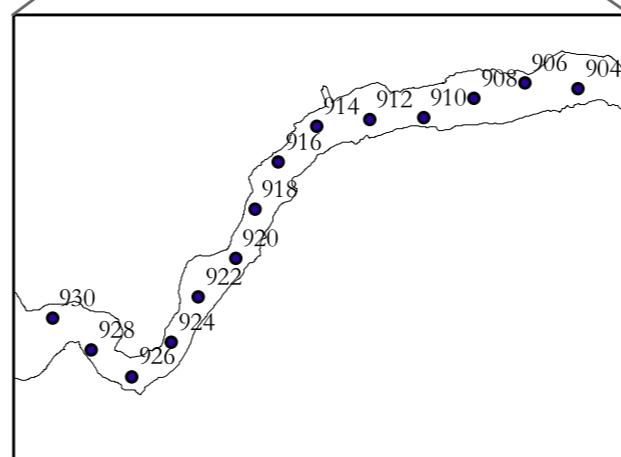

Service Layer Credits: Esri, HERE, Garmin, © OpenStreetMap contributors, and the GIS user community

**Floodplain lowering**  
FLPLOW

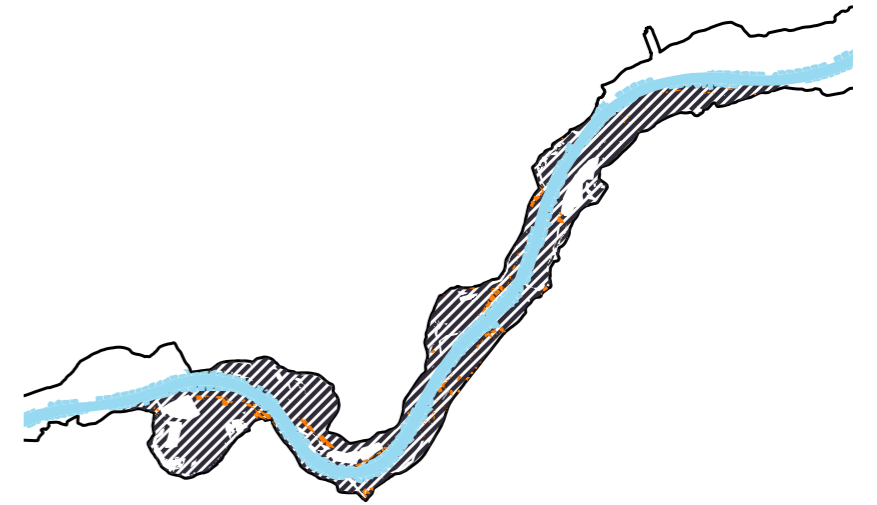

**Floodplain smoothing**  
FLPSMOOTH

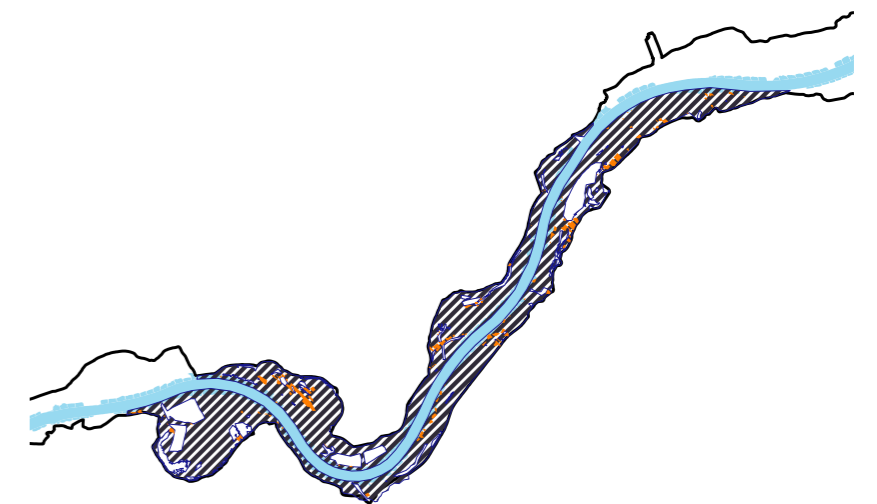

**Minor embankment lowering**  
MINEMBLOW

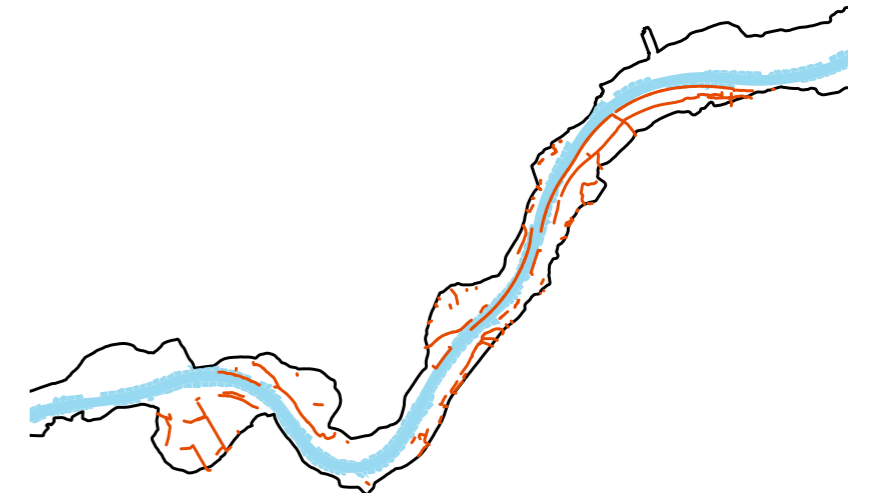

Supplement: Supplementary file 1 [file nhess-2018-325-supplement.pdf]
